# Supplementary material for: Regulation of Cdc42 polarization by the Rsr1 GTPase and Rga1, a Cdc42 GTPase-activating protein, in budding yeast
Source: Oxford University Press journal article supplement (doi:10.1242/jcs.166538), 2015-04-24
Supplement: jcs166538_supp.pdf [file jcs166538_supp.pdf]

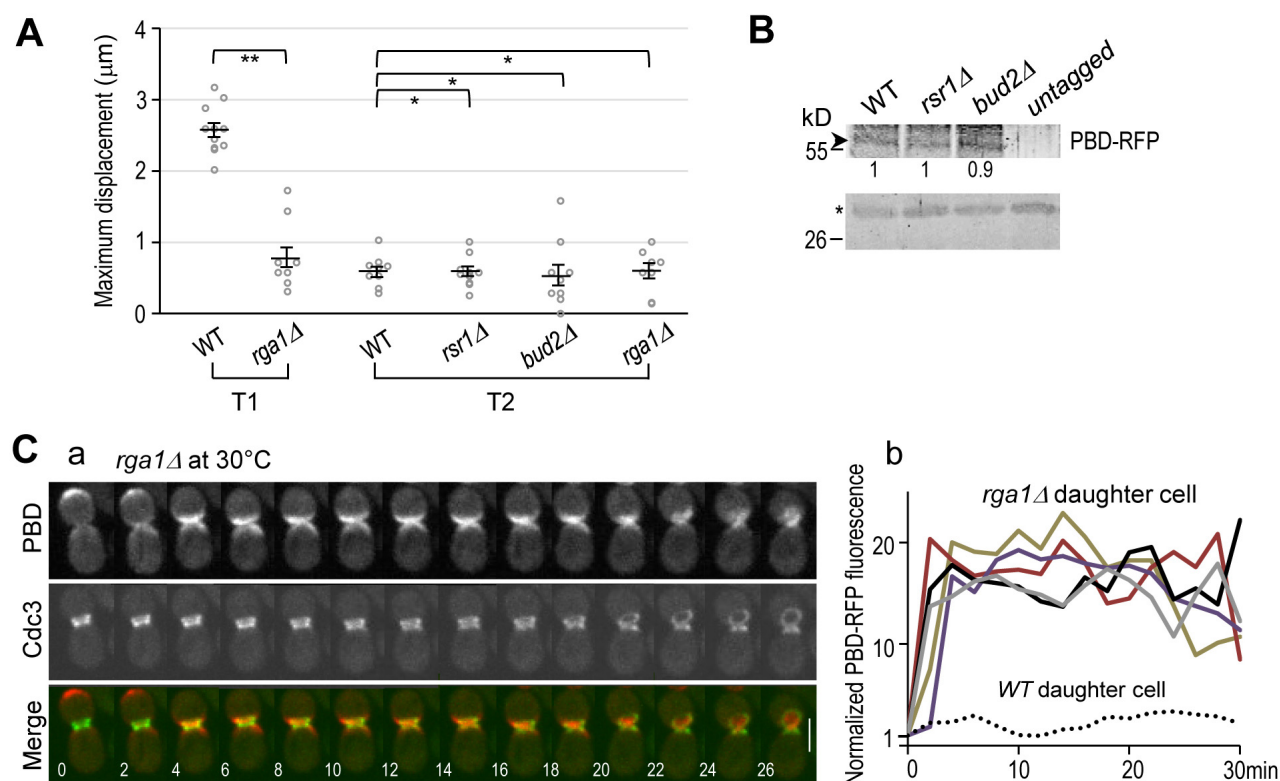

**FIG. S1. Analyses of Cdc42-GTP clusters**

**A.** The maximum displacement of the Cdc42-GTP peak in each individual daughter cell of *WT*, *rsr1Δ*, *bud2Δ*, and *rga1Δ* during T1 and T2 ( $n = 10$  cells for each sample). Mean (horizontal lines)  $\pm$  s.e.m. (error bars) ( $\mu\text{m}$ ). (\* $P > 0.7$ ; \*\* $P < 10^{-8}$ ). Because of the weak activation of Cdc42 in *rsr1Δ* and *bud2Δ* cells during T1, the displacement is not determined for these mutants (see text for details).

**B.** The Gic2-PBD-RFP protein level in *WT*, *rsr1Δ*, and *bud2Δ* cells. The relative amounts (numbers below; normalized to the value in *WT*) were estimated using a non-specific cross-reacting band (marked with an asterisk in lower panel) as a loading control.

**C.** (a) Time-lapse images of PBD-RFP and Cdc3-GFP in *rga1Δ* cells at  $30^\circ\text{C}$ . (b) The intensity of the Cdc42-GTP clusters in the bud neck region was normalized to the same at  $t = 0$ , and five representative plots are shown in comparison to a representative plot of *WT* cells (a dotted line), which was taken from our previous analysis (Kang et al., 2014). Size bar,  $3 \mu\text{m}$ .

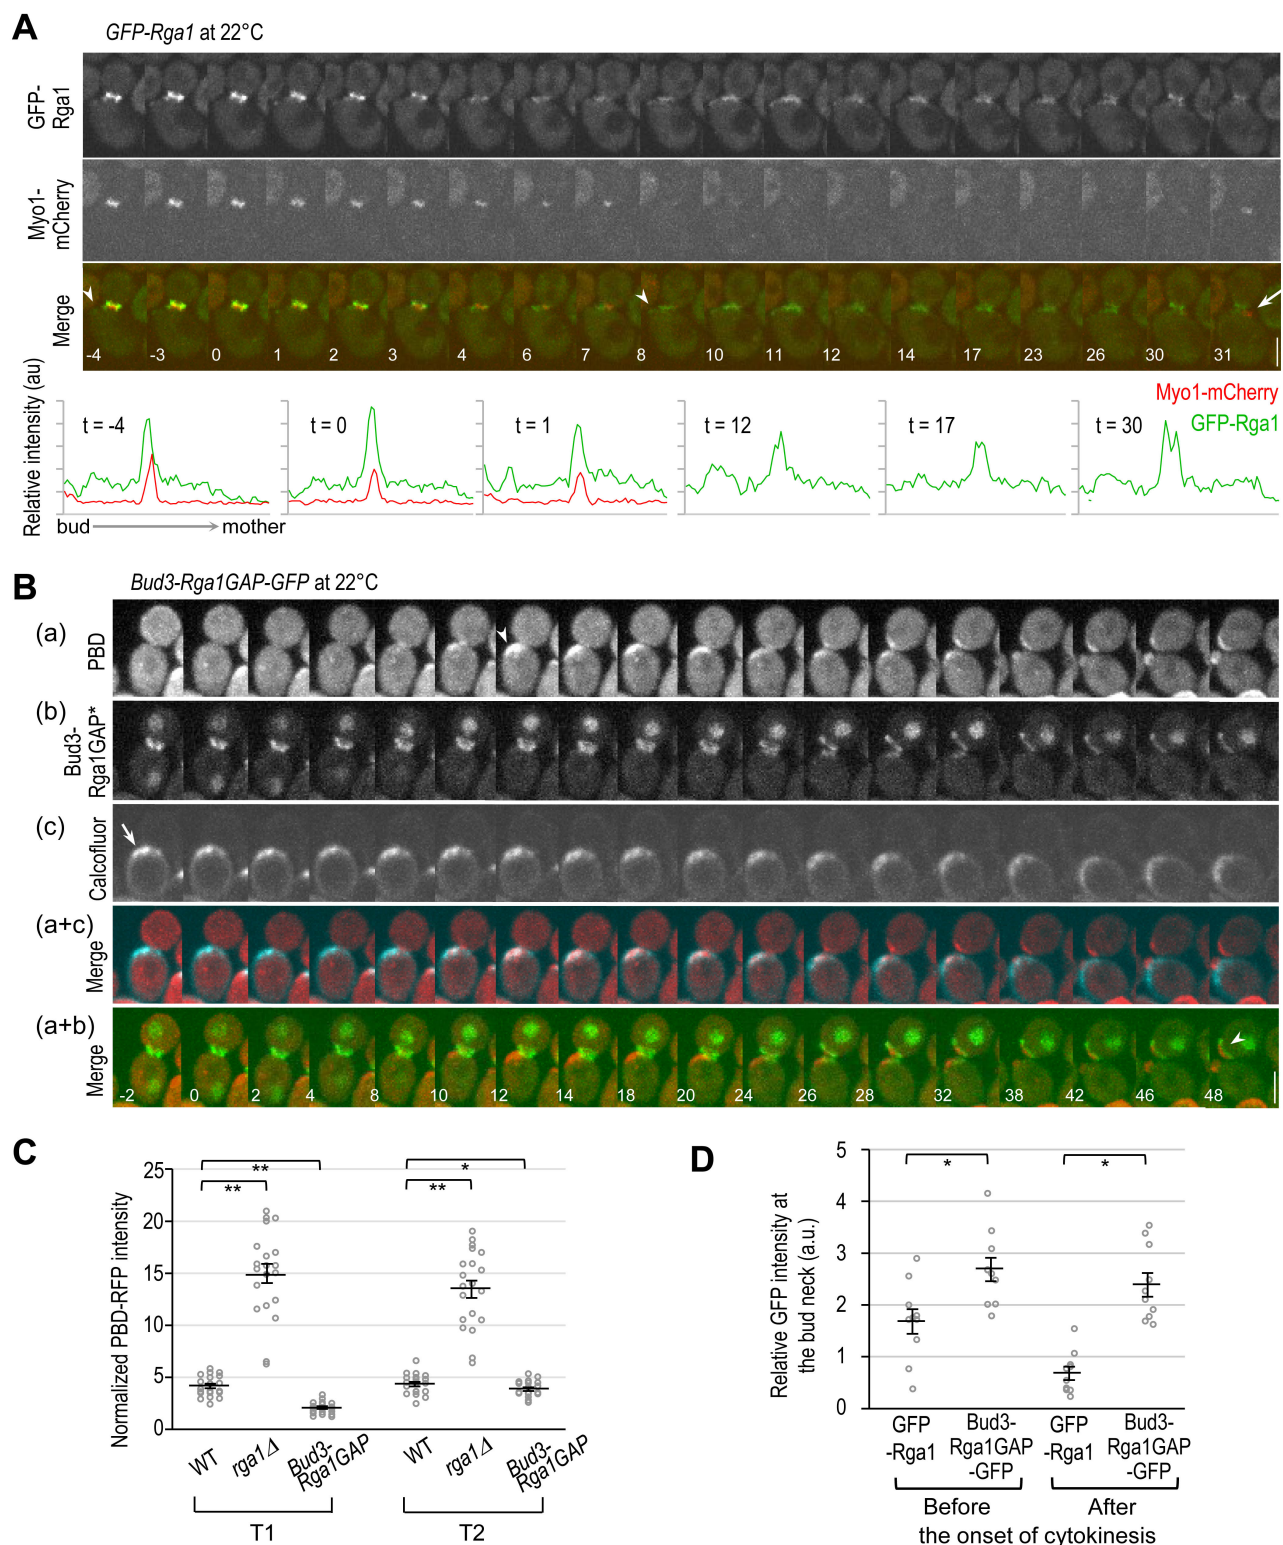

**FIG. S2. Localization of Rga1 and Bud3-Rga1GAP**

A. Time-lapse analysis of GFP-Rga1 and Myo1-mCherry at 22°C. Arrowheads mark GFP-Rga1 localized to the side of the bud neck before and after the Myo1 ring contraction; and an arrow marks the new Myo1-mCherry. (Below) Line-scan graphs show fluorescence intensities (au) of GFP-Rga1 and Myo1-mCherry along the bud-mother axis at selected time points. Bar, 3  $\mu$ m.

**B.** Localization of (a) PBD-RFP; (b) Bud3-Rga1GAP-GFP & Whi5-GFP in an *rga1Δ* cell stained with (c) Calcofluor at 22°C. Merged images are shown below: (a + c) PBD-RFP (red) and Calcofluor (cyan); (a + b) Bud3-Rga1GAP-GFP & Whi5-GFP (green) and PBD-RFP (red). A Cdc42-GTP cluster (marked with an arrowhead) developed at an old bud site (stained with Calcofluor; marked with an arrow) in the mother cell, while a Cdc42-GTP cluster developed within the Bud3-Rga1GAP ring in the daughter cell (marked with an arrowhead at  $t = 48$ ). Numbers indicate time (in min) from the onset of cytokinesis ( $t = 0$ ), which was estimated by the appearance of Whi5 to the nucleus ( $t = -2$  or  $-4$ ). Bar, 3  $\mu\text{m}$ .

**C.** Quantification of the Cdc42-GTP clusters in daughter cells of *WT*, *rga1Δ*, and *rga1Δ BUD3-RGA1GAP* in T1 and T2 phases. PBD-RFP intensity was normalized to its value at  $t = 0$ , and the peak values in each phase are plotted as in Fig. 2Db, except that the bud neck region was used for quantification for all strains. Means (horizontal lines)  $\pm$  s.e.m. (error bars). (\* $P = 0.08$ ; \*\* $P < 10^{-8}$ ).

**D.** Fluorescence intensity of GFP-Rga1 and Bud3-Rga1GAP-GFP at the mother–bud neck from individual cells was plotted ( $n = 10$  for each strain). Mean (horizontal lines)  $\pm$  s.e.m. (error bars). (\* $P < 0.007$ ).



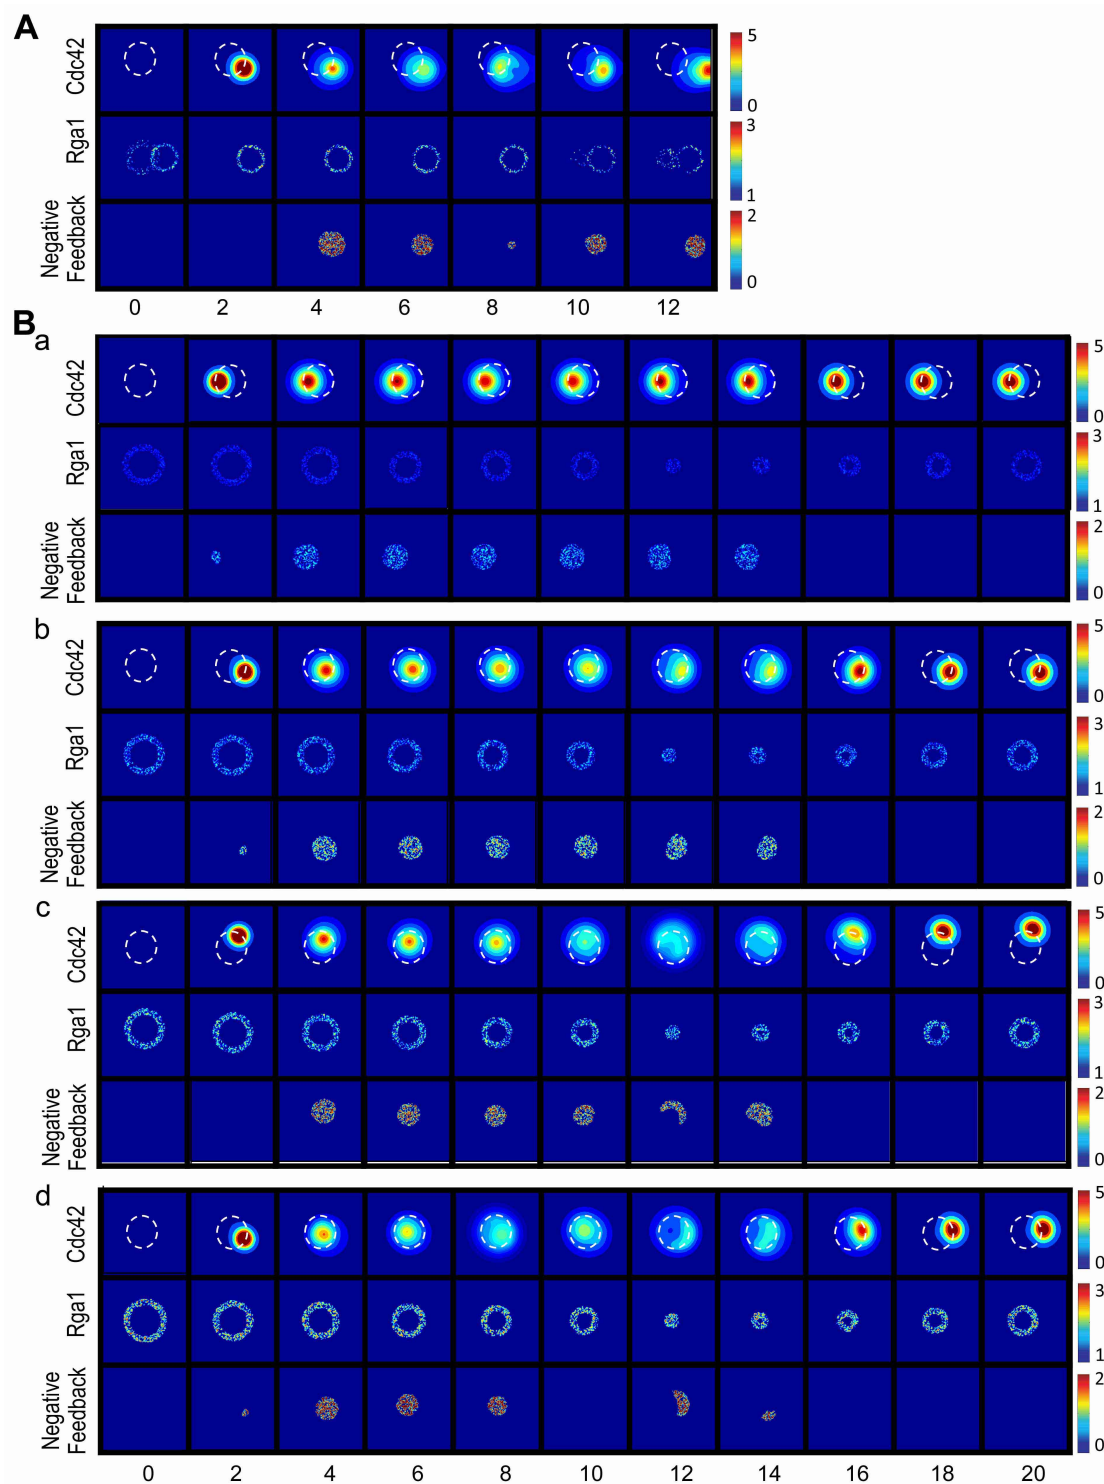

**FIG. S4. Computer simulations of Cdc42 polarization for additional controls**

**A.** Simulations for mother cells when the first and second phases are reversed from the case shown in Fig. 7Bb. See also legend to Fig. 7Bb.

**B.** Simulations for daughter cells with different Rga1 signal strengths. The maximum of Rga1 signal strength is assumed as follows: a)  $1.5 \text{ min}^{-1}$ , b)  $2 \text{ min}^{-1}$ , c)  $2.5 \text{ min}^{-1}$ , and d)  $3 \text{ min}^{-1}$ . Other parameters are the same as in Fig. 7Ba. See legend to Fig. 7Ba.



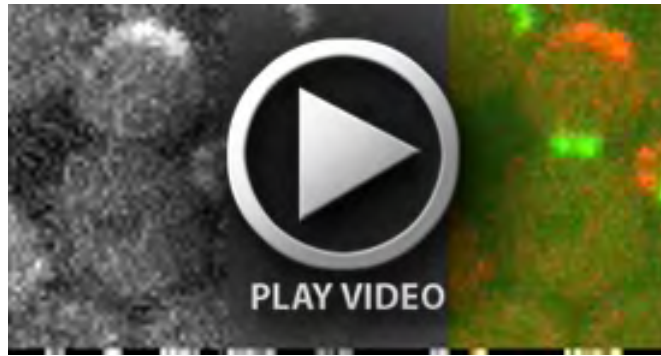

**Movie 1. Localization of Cdc42-GTP in *rsr1Δ* cells.** Gic2-PBD-tdTomato (left), Cdc3-GFP (middle), and merge (right) are shown from time-lapse images of haploid *rsr1Δ* cells. Images were captured at 2 min intervals using a spinning-disk confocal microscope at 30°C. The video shows frames for 34 min starting from 4 min before the onset of cytokinesis. Display rate is 8 frames/sec. Selected images are shown in Fig. 2A.

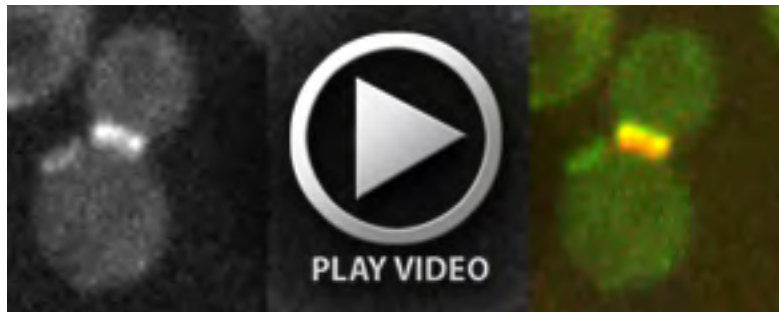

**Movie 2. Localization of GFP-Rga1 and Cdc3-mCherry in haploid *WT* cells.** GFP-Rga1 (left), Cdc3-mCherry (middle), and merge (right) are shown from time-lapse images of *WT* cells. Images were captured at 2-min intervals using a spinning-disk confocal microscope at 22°C. The video shows frames for 56 min, starting from 4 min before the onset of cytokinesis. Display rate is 8 frames/sec. Selected images are shown in Fig. 5A.

**Table S1. Duration times of T1 and T2 in mother (M) and daughter (D) cells**

|               | <i>WT</i>         | <i>rsr1Δ</i>     | <i>bud2Δ</i> *   | <i>rga1Δ</i>      | <i>rga1Δ BUD3</i><br><i>-RGA1GAP</i> |
|---------------|-------------------|------------------|------------------|-------------------|--------------------------------------|
| T1 in M cells | 6.67 ± 0.67 (12)  | 5.80 ± 0.76 (10) | 19.9 ± 1.43 (20) | 5.46 ± 0.36 (15)  | 6.60 ± 0.85 (10)                     |
| T2 in M cells | 14.36 ± 0.65 (11) | 15.67 ± 0.61 (6) |                  | 14.93 ± 1.18 (15) | 13.40 ± 1.90 (10)                    |
| T1 in D cells | 26.00 ± 2.27 (7)  | 26.67 ± 5.12 (9) | 39.1 ± 3.20 (17) | 26.57 ± 1.79 (14) | 26.00 ± 2.57 (9)                     |
| T2 in D cells | 14.86 ± 0.40 (7)  | 14.33 ± 0.33 (6) |                  | 15.00 ± 0.68 (10) | 12.89 ± 0.95 (9)                     |

Numbers indicate the mean ± s.e.m. (min) of T1 and T2, which were estimated by the nuclear exit of Whi5-GFP. Total cell number is shown in ( ).

\*Numbers in *bud2Δ* cells indicate estimated time for T1 plus T2 (from the onset of cytokinesis until bud emergence).

**Table S2. Yeast strains used in this study**

| Strain  | Relevant Genotype <sup>a</sup> |                                                                                                         | Source                    |
|---------|--------------------------------|---------------------------------------------------------------------------------------------------------|---------------------------|
| YEF473A | <i>MATa</i>                    | <i>his3-Δ200 leu2-Δ1 lys2-801 trp1-Δ63 ura3-52</i>                                                      | (Bi and Pringle, 1996)    |
| YZT292  | <i>MATa</i>                    | <i>CDC3-GFP::LEU2 GIC2-PBD-tdTomato::URA3</i>                                                           | (Tong et al., 2007)       |
| YZT293  | <i>MATa</i>                    | <i>rga1Δ::HIS3 CDC3-GFP::LEU2 GIC2-PBD-tdTomato::URA3</i>                                               | (Tong et al., 2007)       |
| YEF2324 | <i>MATa</i>                    | <i>rga1Δ::HIS3</i>                                                                                      | (Tong et al., 2007)       |
| JGY1622 | <i>MATa</i>                    | <i>rga1Δ::HIS3 BUD3-rga1(aa700–1007)-GFP:URA3</i>                                                       | (Tong et al., 2007)       |
| YZT158  | <i>MATa</i>                    | <i>GFP-RGA1</i>                                                                                         | (Tong et al., 2007)       |
| HPY2512 | <i>MATa</i>                    | <i>GFP-RGA1 CDC3-mCherry::LEU2</i>                                                                      | This study                |
| HPY2671 | <i>MATα</i>                    | <i>WHI5-GFP::TRP1 GIC2-PBD-tdTomato::URA3</i>                                                           | This study <sup>b,e</sup> |
| HPY2690 | <i>MATa</i>                    | <i>BUD3-rga1(aa700–1007)-GFP::URA3</i>                                                                  | This study <sup>d</sup>   |
| HPY2653 | <i>MATα</i>                    | <i>rsr1Δ::URA3 CDC3-GFP::LEU2 GIC2-PBD-tdTomato::URA3</i>                                               | This study <sup>b</sup>   |
| HPY2626 | <i>MATa</i>                    | <i>rga1Δ::HIS3 BUD3-rga1(aa700–1007)-GFP:URA3 WHI5-GFP::TRP1 GIC2-PBD<sup>W23A</sup>-tdTomato::LEU2</i> | This study <sup>c</sup>   |
| HPY2669 | <i>MATα</i>                    | <i>rsr1Δ::URA3 WHI5-GFP::KANMX6 GIC2-PBD-tdTomato::URA3</i>                                             | This study <sup>b,e</sup> |
| HPY2695 | <i>MATa</i>                    | <i>bud2Δ::LEU2 CDC3-GFP::LEU2 GIC2-PBD-tdTomato::URA3</i>                                               | This study <sup>b</sup>   |
| HPY2668 | <i>MATα</i>                    | <i>rga1Δ::HIS3 WHI5-GFP::TRP1 GIC2-PBD-tdTomato::URA3</i>                                               | This study <sup>b</sup>   |

<sup>a</sup>All strains are isogenic to YEF473A, except as indicated. The original strains and plasmids expressing Gic2-PBD-tdTomato, GFP-Rga1, Bud3-Rga1GAP-GFP, and Cdc3-mCherry were previously described (Tong et al., 2007). Plasmid pRS314-MYO1-mCherry (Wloka et al., 2011) was transformed into YZT158 for imaging.

<sup>b</sup>YIp211-GIC2-PBD(aa 1-208)-tdTomato (Tong et al., 2007) was used for integration at the *ura3* locus.

<sup>c</sup>YIplac128-PBD<sup>W23A</sup>-tdTomato (Okada et al., 2013) was used for integration at the *leu2* locus.

<sup>d</sup>The Bud3-Rga1GAP-GFP fusion was expressed in haploid *WT* (HPY210) at the *BUD3* locus by targeting the Rga1GAP domain (aa 700-1007) (which was fused to GFP) into the 3' of the *BUD3* ORF. Expression of Bud3-Rga1GAP-GFP did not interfere the axial budding pattern of *WT* (*RGA1*) haploid cells (data not shown).

<sup>e</sup>Whi5-GFP was expressed by targeting GFP at the C terminus, replacing the endogenous Whi5 (Kang et al., 2014).



**Table S3. The values of parameters used in the simulations**

| Parameters         | Value*                                                              | References                                      |
|--------------------|---------------------------------------------------------------------|-------------------------------------------------|
| $D_m$              | $0.1\mu m^2 \text{ min}^{-1}$                                       | (Goryachev and Pokhilko, 2008; Lo et al., 2013) |
| $K_1$              | 0.3                                                                 | (Lo et al., 2013) & estimated                   |
| $K_2$              | 0.2                                                                 | (Lo et al., 2013) & estimated                   |
| $k_{on1}, k_{on2}$ | $1 \text{ min}^{-1}$                                                | (Lo et al., 2013) & estimated                   |
| $K_{off}$          | 2                                                                   | This study                                      |
| $t_1$              | 1 min                                                               | This study                                      |
| $t_{off}$          | a) 15min (daughter cells)<br>b) 3min (mother cells)<br>S3A infinity | This study                                      |

\* The value of the normalizing parameter  $K_1$  was chosen to achieve spontaneous budding without spatial cues. The parameter  $K_{off}$  is the threshold of Cdc42 for functioning negative feedback and  $t_1$  is the time delay for negative feedback. This setting is based on the best simulation for achieving dynamic movement of Cdc42-GTP cluster. We observed that the conclusion obtained from the outputs is consistent when  $K_{off}$  is between 1 and 3 and  $t_1$  is between 0.75 min and 1.5 min. In the Figures, (a) and (b) represents the case for haploid daughter cells (*i.e.*,  $t_{off} = 15 \text{ min}$ ) and mother cells (*i.e.*,  $t_{off} = 3 \text{ min}$ ), respectively.

**Table S4. Formula for the deactivation term and specific settings used in the simulations**

$$k_{off}(a(x, t - t_1), x, t) = g_1(x, t) + g_2(x, t)H(a(x, t - t_1) - K_{off}), \quad H(a) = \begin{cases} 0, & \text{if } a \leq 0 \\ 1, & \text{if } a > 0 \end{cases}.$$

| Figures | $g_1(x, t)$<br>(Rga1-mediated deactivation)                                                   | $g_2(x, t)$<br>(negative feedback on the deactivation) |
|---------|-----------------------------------------------------------------------------------------------|--------------------------------------------------------|
| 4B      | $1 \text{ min}^{-1}$                                                                          | $0 \text{ min}^{-1}$                                   |
| 4C      | $1 \text{ min}^{-1} + 2d_d(x, t)^*$ if $0.5 <  x  < 0.65$ ;<br>$1 \text{ min}^{-1}$ otherwise | $0 \text{ min}^{-1}$                                   |
| 7A      | Rga1 dynamics shown in Fig. 7A**                                                              | $0 \text{ min}^{-1}$                                   |
| 7B      | Rga1 dynamics shown in Fig. 7B**                                                              | $4\theta_1(t)\delta_d(x)$                              |
| 7C      | $1 \text{ min}^{-1} + 2d_d(x, t)$ if $0.5 <  x  < 0.65$ ;<br>$1 \text{ min}^{-1}$ otherwise   | $4\theta_1(t)\delta_d(x)$                              |
| S3A     | Rga1 dynamics shown in Fig. 7A                                                                | $4\delta_d(x)$                                         |
| S3B     | $1 \text{ min}^{-1}$                                                                          | $4\theta_1(t)\delta_d(x)$                              |

\*  $d_d(x, t)$  is a spatiotemporal uncorrelated random function with uniform distribution between 0 and 1 for each  $x$  and  $t$ .

\*\*The distribution of Rga1 changes according to the following formula for the changes of the non-zero regions ( $r$  is the distance from a point to the center of the domain, namely  $(|x|)$ ;  $r'$  is the distance from a point to the point 1mm right to the center of the domain, namely  $(|x - (1, 0)|)$ ):

Daughter cells:  $\{0.3(1-t/10) + 0.3 < r < 0.3(1-t/10) + 0.6\}$  for  $0 < t < 10$ ;  $\{r < 0.3\}$  for  $10 < t < 12$ ;  $\{0.35(t-12)/8 < r < 0.35(t-12)/8 + 0.3\}$  for  $12 < t < 20$ ;

Mother cells:  $\{0.5 < r < 0.8\}$  and  $\{0.5 < r' < 0.65\}$  for  $0 < t < 2$ ;  $\{0.5 < r' < 0.65\}$  for  $2 < t < 8$ ;  $\{0.35(t-16)/8 < r < 0.35(t-16)/8 + 0.3\}$  and  $\{0.5 < r' < 0.65\}$  for  $8 < t < 16$ ;  $\{0.35 < r < 0.65\}$  for  $16 < t < 20$ .

The results in Fig. S4, B show that when the maximum of Rga1 signal strength increases to  $3 \text{ min}^{-1}$ , the Cdc42 localization becomes more drifting. To match with experimental observation, we take the maximum of Rga1 signal to be  $3 \text{ min}^{-1}$  and the magnitude of Rga1  $3d_d(x, t)$ . Note that the negative feedback functions when  $a(x, t - t_1)$  is larger than  $K_{off}$ .
